# Supplementary material for: Single-Molecule Real-Time Sequencing for Identifying Sexual-Dimorphism-Related Transcriptomes and Genes in the Chinese Soft-Shelled Turtle (Pelodiscus sinensis)
Source: MDPI journal article supplement (doi:10.3390/ani13233704), 2023-11-29
Supplement: s1 [file s1]

Table S1 CCS data volume statistics

| Library | Total Bases(bp) | ROI       | Mean Length (bp) | Mean quality | Mean Passes |
|---------|-----------------|-----------|------------------|--------------|-------------|
| F 0-2K  | 855,098,963     | 427,494   | 2,000            | 0.97         | 14          |
| F 2K+   | 1,154,409,533   | 337,154   | 3,423            | 0.95         | 7           |
| M 0-2K  | 754,494,230     | 400,518   | 1,883            | 0.96         | 13          |
| M 2K+   | 1,160,635,111   | 371,683   | 3,122            | 0.95         | 8           |
| Total   | 3,924,637,837   | 1,536,849 | -                | -            | -           |

Table S2 The annotation of gene structure

| Type      | Number of annotated | Number of Identification |
|-----------|---------------------|--------------------------|
| Loci      | 23,371              | 30,670                   |
| Loci<1k   | 5,560(23.79%)       | 2,096(6.83%)             |
| Loci 1-2k | 5,909(25.28%)       | 8,975(29.26%)            |
| Loci 2-3k | 4,297(18.39%)       | 8,628(28.13%)            |
| Loci >3k  | 7,605(32.54%)       | 10,971(35.77%)           |

Table S3 Primers for RT-qPCR

| Gene           | Primer(5'~3')                 |
|----------------|-------------------------------|
| <i>Smad4</i>   | F:ACCAGCACTGCCAACTTTCCC       |
|                | R:GCTGAGGCCCTGATGCTATCTG      |
| <i>Wif1</i>    | F:AACCGTCAATGTCCCTCTGCT       |
|                | R:CATCCACTTCAAATGCTGCCAC      |
| <i>Nkd2</i>    | F:AGGGTGGCTGACAGGAGGTTG       |
|                | R:GCGAGGTCCAGGTAGTGGTTTCT     |
| <i>17β-hsd</i> | F:ATGCCACATTGCGGGACCTGA       |
|                | R:CACAGCACCCACAGCGTTCAA       |
| <i>CPY2J</i>   | F:CCACAACTCTGCGATGGGCTCT      |
|                | R:CGCCGTCAAATTGGTCAGGATC      |
| <i>Neur11</i>  | F:TGAGGAGTTTGCCAATGAGGG       |
|                | R:AGTTGAGTGAGTTCTGCGGGAT      |
| <i>Prp18</i>   | F:CGCTCCAAACAACAGAGTCGC       |
|                | R:GTCCTCCTCTTCCTCATACTCCACATC |
| <i>Wdr24</i>   | F:GCAGGTGATGCTGTGGAGTCTT      |
|                | R:AATGGGCTAGGGCAGGGTTTA       |
